1 How symbiosis and ecological context influence the variable expression of transgenerational

2 wing induction upon fungal infection of aphids

3

4 Wen-Hao Tan<sup>1</sup>, Miguel L. Reyes<sup>1</sup>, Kim L. Hoang<sup>1</sup>, Tarik Acevedo<sup>1,#</sup>, Fredrick Leon<sup>1</sup>, Joshua

5 D. Barbosa<sup>1</sup>, Nicole M. Gerardo<sup>1\*</sup>.

6

7 <sup>1</sup>Department of Biology, Emory University, Atlanta, Georgia, United States of America.

8 <sup>#</sup>Department of Ecosystem Science and Management, Penn State University, State College,

9 Pennsylvania, United States of America.

10

11 \*Corresponding author

12 Email: [ngerard@emory.edu](mailto:ngerard@emory.edu) (NMG)

## 13 **Abstract**

14       Aphids, like most animals, mount a diverse set of defenses against pathogens. For aphids,  
15 two of the best studied defenses are symbiont-conferred protection and transgenerational  
16 wing induction. Aphids can harbor bacterial symbionts that provide protection against  
17 pathogens, parasitoids and predators, as well as against other environmental stressors. In  
18 response to signals of danger, aphids also protect not themselves but their offspring by  
19 producing more winged than unwinged offspring as a way to ensure that their progeny may  
20 be able to escape deteriorating conditions. Such transgenerational wing induction has been  
21 studied most commonly as a response to overcrowding of host plants and presence of  
22 predators, but recent evidence suggests that pea aphids (*Acyrtosiphon pisum*) may also begin  
23 to produce a greater proportion of winged offspring when infected with fungal pathogens.  
24 Here, we explore this phenomenon further by asking how protective symbionts, pathogen  
25 dosage and environmental conditions influence this response. Overall, while we find some  
26 evidence that protective symbionts can modulate transgenerational wing induction in  
27 response to fungal pathogens, we observe that transgenerational wing induction in response  
28 to fungal infection is highly variable. That variability cannot be explained entirely by  
29 symbiont association, by pathogen load or by environmental stress, leaving the possibility  
30 that a complex interplay of genotypic and environmental factors may together influence this  
31 trait.

## 32 Introduction

33 Animals have evolved several forms of defense against pathogens. Although the most  
34 studied defenses are mediated by cellular and humoral immune mechanisms, some defenses  
35 are mediated by behavioral mechanisms or symbiotic, microbial partners [1]. These  
36 alternative forms of defense may act in isolation or may influence one another.

37 Pea aphids (*Acyrtosiphon pisum*) utilize an array of defense strategies, and thus are a  
38 suitable system for studying how alternative forms of defense interact with one another. One  
39 defense, referred to here as transgenerational wing induction, arises from pea aphids'  
40 reproductive biology. Under summer conditions, pea aphids asexually produce clonal copies  
41 of themselves, and, though genetically identical, these clonal offspring can be either  
42 unwinged (apterous) or winged (alate). For aphids, one commonly mounted defense against  
43 environmental stress, predators, and parasites is increased production of winged (relative to  
44 unwinged) offspring that can hopefully escape to better conditions [2–4]. Such  
45 transgenerational wing induction is similar to other transgenerational defenses, a  
46 phenomenon seen in many insect systems, in which defenses against pathogens are mounted  
47 not to protect oneself but to protect one's offspring [5]. For example, immune-challenged  
48 bumblebees (*Bombus terrestris*) produce offspring with higher levels of antibacterial activity  
49 [6], and when infected with a protozoan parasite, monarch butterflies preferentially lay their  
50 eggs on plants that increase their offsprings' resistance to the parasite [7]. Though aphid

51 transgenerational wing induction is best known as a response to host plant overcrowding and  
52 presence of predators [3], recent work suggests that aphids utilize transgenerational wing  
53 induction in response to pathogen infection as well. Specifically, Hatano et al. [8]  
54 demonstrated that pea aphids can increase production of winged offspring in response to  
55 infection with the natural aphid pathogen, *Pandora neoaphidis*.

56 The finding that transgenerational wing induction is a potential aphid defense against  
57 fungal pathogens suggests that this form of defense could interact with another common  
58 aphid defense against fungal pathogens, namely association with protective bacterial  
59 symbionts. All pea aphids harbor an obligate endosymbiont, *Buchnera aphidicola*, that is  
60 essential for their survival and reproduction. In addition, individuals can harbor one to a few  
61 different facultative symbionts that can increase their hosts' fitness [9–11]. Specifically,  
62 *Regiella insecticola*, a facultative endosymbiont, confers resistance against fungal pathogens  
63 [12], including *Pandora neoaphidis* [10], an important natural enemy in wild populations  
64 [13]. Interestingly, *R. insecticola* has been shown to impact transgenerational wing induction  
65 in response to crowding, suggesting the potential for the symbiosis to influence  
66 transgenerational wing induction in response to pathogens as well [14].

67 Our primary goal was to leverage the aphid - *Regiella* symbiont - *Pandora* pathogen  
68 system to explore how protective symbionts influence transgenerational defense. In our  
69 preliminary investigations, however, transgenerational wing induction in response to fungal

70 infection was not consistently observed. To attempt to explain this variability, we also  
71 conducted a series of experiments to explore whether *R. insecticola* genotypes vary in their  
72 influence on transgenerational wing induction upon fungal infection, and whether the degree  
73 of pathogen exposure or environmental quality influences transgenerational wing induction  
74 upon fungal infection.

75

## 76 **Materials and methods**

### 77 **Aphid lines**

78 We used five lines of pea aphids (*Acyrtosiphon pisum*) previously established in the  
79 laboratory that have the same aphid genetic background but that harbor different genotypes of  
80 the secondary, facultative symbiont, *Regiella insecticola*. The five lines were established by  
81 experimentally infecting a single clonal aphid lineage, LSR1 [15], which did not have  
82 *Regiella*, with five genetically distinct *Regiella* (Ri, 313, 5.15, CO21, and U1), collected in  
83 previous studies [16–18], using established protocols [19,20]. This created lines LSR1-Ri,  
84 LSR1-313, LSR1-5.15, LSR1-CO21, and LSR1-Ui, which we abbreviate here as LRi, L313,  
85 L515, LCO21, and LUi. In addition to these five lines, we also maintained a line without  
86 *Regiella* (LSR1-01, abbreviated as L01). Upon establishment, all aphid lines were reared  
87 asexually on fava beans (*Vicia faba*) in a temperature-controlled growth chamber at 20 °C  
88 under a 16/8h L/D cycle, which maintains them as asexual clones. Presence of symbionts was

89 confirmed via PCR prior to conducting experiments [18,21].

90

## 91 ***Pandora* fungal pathogen infections**

92 *Pandora neoaphidis* ARSEF 2588 was obtained from the Agricultural Research Service

93 Collection of Entomopathogenic Fungal Cultures, USA. We maintained *Pandora* in the

94 laboratory by *in vivo* culturing, storing dead, infected aphids at 4 °C following methods

95 described in Parker et al. [17]. We performed the fungal infection experiments using an

96 established protocol [22] that mimics the natural route of pathogen transmission. Infected

97 aphid cadavers, the fungal source, were placed on 1.5% tap water agar at 18 °C for 14-16

98 hours, providing sufficient time for the fungus to sporulate prior to aphid infections.

99 Recently-molted (10-day old) adult aphids were experimentally infected by placing them in

100 the bottom of an infection chamber (a PVC tube, 28 mm diameter and 40 mm height) on top

101 of which we placed an agar plate with sporulating cadavers, allowing the experimental aphids

102 to receive a fungal spore shower. Agar plates were rotated among infection chambers to

103 homogenize the infection dosage, and a grid slide was used to estimate the infection dosage

104 (number of spores / mm<sup>2</sup>). The infection period was 3-hr unless otherwise specified. Control

105 aphids were handled similarly but were instead placed under agar plates without infected

106 cadavers. After infection, we transferred aphids to two-week-old fava plants to monitor

107 survival and offspring production. During the first four days post-infection, the plants were

108 covered with solid plastic cups in order to keep the environment moist, as *Pandora* requires  
109 high humidity to infect aphids [23]. Afterward, the plants were covered by plastic cups with  
110 mesh tops.

111

## 112 **Overview of survival and wing induction measurements**

113 We used survivorship to quantify the differences in *Pandora* resistance between aphid  
114 lines and measured induction of winged offspring production as a transgenerational defense  
115 trait. For survival assays, we inspected infected and uninfected aphids daily to record survival.  
116 Dead aphids were checked for visible signs of sporulation. We monitored survival for 9-10  
117 days, as infection-caused mortality and sporulation usually occur between 4 -10 days after  
118 exposure in this system [22]. For transgenerational wing induction, we collected offspring  
119 produced in the four days post fungal infection by transferring each adult aphid to a new plant  
120 every other day. We recorded the number of offspring produced each day. The proportion of  
121 offspring that were winged was recorded after each cohort reached adulthood.

122

## 123 **Experiment 1: Influence of *Regiella* presence on transgenerational** 124 **wing induction upon *Pandora* infection**

125 We used two aphid lines, LRi (harboring *Regiella*) and L01 (without *Regiella*). We  
126 exposed 34 aphids of each line to *Pandora*, and monitored 34 control, uninfected aphids per

127 line as well. For each treatment group, 10 aphids went to individual plants to monitor  
128 offspring production, and 24 aphids were monitored (8 aphids on each of three plants) for  
129 survival. We monitored survival of the exposed (F0) aphids and assessed the proportion of  
130 their offspring (F1) that were winged using methods detailed above. After the F1 aphids  
131 became adults, we typically randomly selected six unwinged, F1 offspring of each F0  
132 individual and transferred them to individual plants to monitor the winged status of the F2  
133 generation. Twenty-two F0 individuals produced fewer than six unwinged offspring however,  
134 and we thus used fewer offspring from these individuals (F1 per F0: range = 1-6, median =  
135 5).

136

## 137 **Experiment 2: Influence of alternative *Regiella* lines on** 138 **transgenerational wing induction upon *Pandora* infection**

139 Given that we did not observe wing induction in either *Regiella*-present or  
140 *Regiella*-absent lines in Experiment 1 in response to fungal infection, and that  
141 *Regiella*-mediated resistance against *Pandora* is dependent on genotype-by-genotype  
142 specificity [17], we hypothesized that *Regiella*'s influence on transgenerational wing  
143 induction could also be genotype-specific. In this experiment, we tested for the effect of  
144 symbiont genotype on resistance and wing induction upon fungal infection. We used all six  
145 lines of aphids described above (five lines harboring different genotypes of *Regiella* and one



146 without *Regiella*). We performed the experiment twice. We first conducted the experiment  
147 using previously established lines, and then repeated this experiment with re-established lines  
148 to ensure that the host genetic background was identical across all lines (while aphids  
149 clonally reproduce, mutations can occur and become fixed in lab lines). We conducted  
150 infections and monitored survival of F0 individuals, and measured the proportion of their F1  
151 offspring that were winged following methods described above, with the exception that in the  
152 first experiment we did a 3-day rather than 4-day collection of F1 offspring due to logistical  
153 constraints. Although the same protocol and infection period was used, the fungal dosages  
154 were very different between the two replicates. The fungal infection dosage was 12.3  
155 spores/mm<sup>2</sup> in Replicate A and 105.6 spores/mm<sup>2</sup> in Replicate B. For Replicate A, sample  
156 sizes ranged from 3 – 10 (median = 6.5) per treatment group; for Replicate B, sample sizes  
157 ranged from 11 – 12 (median = 12) per treatment group. For Replicate B, aphid line L313  
158 was removed from analyses due to low survival of the control group (all died within 10 days).

159

### 160 **Experiment 3: Influence of pathogen dose on transgenerational** 161 **wing induction upon *Pandora* infection**

162 Given that the two replicates of Experiment 2 showed different results in terms of  
163 transgenerational offspring production in response to *Pandora* infection, we attempted to  
164 examine the potential factors influencing this response. A previous study demonstrated that

165 higher infection dosage leads to higher pathogen burden and higher mortality in this system  
166 [22]. Due to the fact that the infection dosage was markedly different in the two replicates of  
167 Experiment 2, we hypothesized that induction of winged offspring production might be  
168 dependent on pathogen load. To test this, we exposed two aphid lines (LRi and L01) to three  
169 infection dosages: high (144.1 spores/mm<sup>2</sup>), medium (12.5 spore s/mm<sup>2</sup>), and low (1.6  
170 spores/mm<sup>2</sup>) by altering the infection period to manipulate infection dosage. That is, a higher  
171 dosage group was infected for a longer time. In order to control for a confounding effect that  
172 staying longer in a chamber could increase stress, we added an uninfected control group for  
173 each infection period. Thus, this experiment was a fully factorial design of three infection  
174 periods (which correlates with dosage), two infection treatments (infected and uninfected),  
175 and two aphid lines. Sample sizes ranged from 10 – 12 (median = 11) per treatment group.  
176 After fungal infection, we followed the methods described above to monitor survival and  
177 offspring production.

178

#### 179 **Experiment 4: Influence of environmental condition on** 180 **transgenerational wing induction upon *Pandora* infection**

181 Our results in Experiment 3 did not detect increased production of winged offspring  
182 under high pathogen load, suggesting that pathogen dosage alone is not the main factor  
183 triggering the expression of this response. Through comparing conditions in the above

184 experiments, we hypothesized that other factors, such as host plant quality and aphid health,  
185 could influence the production of winged offspring. To manipulate condition, in Experiment 4,  
186 we used starvation and drought as abiotic stresses, both of which have been shown to  
187 negatively affect pea aphids [24–26]. For the starvation treatment, prior to fungal infections,  
188 we starved aphids for 12 hours when they were four days old (young nymph) and again when  
189 they were 10 days old (newly-molted adults). To do so, we moved aphids that were reared on  
190 the same plant to another pot with moist soil but no plants. Aphids were transferred back to  
191 their original plant after the starvation treatment. For drought treatments, we transplanted  
192 fava plants to dry soil the same day we transferred aphids onto them. Those two treatments  
193 caused the aphids to look pale, which is an indication of poor condition [27]. This experiment  
194 was thus a fully factorial design of three environmental conditions (starvation, drought, and  
195 control), two infection treatments (infected, uninfected) and two lines (LRi and L01). We  
196 used seven aphids for each treatment group. We followed the same infection protocol as  
197 above, using an infection period of eight hours to reach a medium dosage (21.0 spores/mm<sup>2</sup>).  
198 After fungal infection, we assayed survival and offspring production as above.

199

## 200 **Statistical analyses**

201 Across all experiments, we measured survivorship and the proportion offspring that  
202 were winged and tested for the effects of several factors. Survival analyses were performed

203 using Cox Proportional Hazardous models using the R package survival 2.41-3 [28]. The  
204 proportions of offspring that were winged were analyzed using General Linear Models  
205 (GLMs) with either binomial or quasi-binomial error structures, depending on the dispersion  
206 parameter. All analyses were performed using R version 3.4.1 [29].

207

## 208 **Results**

### 209 **Experiment 1: Influence of *Regiella* presence on transgenerational** 210 **wing induction upon *Pandora* infection**

211 Fungal infection significantly reduced aphid survival, and aphid lines differed in their  
212 survival; however, there was no significant interaction between infection status and aphid line  
213 (Fig 1A; infection:  $\chi^2 = 8.198$ ,  $df = 1$ ,  $P = 0.004$ ; line:  $\chi^2 = 14.938$ ,  $df = 1$ ,  $P < 0.001$ ;  
214 interactions:  $\chi^2 = 0.270$ ,  $df = 1$ ,  $P = 0.604$ ). *Pandora* fungal infection of F0 generation aphids  
215 did not induce production of winged offspring relative to control, uninfected aphids (Table 1).  
216 Specifically, while some F1 offspring were winged, and symbiont status significantly affected  
217 this trait, it was not influenced by fungal infection of their mothers (Table 1; Fig 1B). The F2  
218 generation consisted of few winged: two out of 2854 F2 offspring were winged. Specifically,  
219 out of a total of 195 F1 aphids, only two of them produced a winged offspring.

220

221 **Table 1. Results of analysis of deviance of GLMs for the proportion of offspring that**

222 were winged for the four experiments.

|                                  | Deviance | df | P-value           |
|----------------------------------|----------|----|-------------------|
| <u>Experiment 1: F1</u>          |          |    |                   |
| Infection                        | 0.110    | 1  | 0.873             |
| Line                             | 18.940   | 1  | <b>0.037*</b>     |
| Infection * Line                 | 5.502    | 1  | 0.260             |
| <u>Experiment 2: Replicate A</u> |          |    |                   |
| Infection                        | 0.170    | 1  | 0.886             |
| Line                             | 62.747   | 5  | 0.064             |
| Infection * Line                 | 102.073  | 5  | <b>0.005**</b>    |
| <u>Experiment 2: Replicate B</u> |          |    |                   |
| Infection                        | 296.120  | 1  | < <b>0.001***</b> |
| Line                             | 24.065   | 5  | < <b>0.001***</b> |
| Infection * Line                 | 12.276   | 5  | <b>0.021*</b>     |
| <u>Experiment 3</u>              |          |    |                   |
| Infection                        | 0.054    | 1  | 0.901             |
| Dosage                           | 36.349   | 2  | <b>0.005**</b>    |
| Line                             | 0.372    | 1  | 0.743             |
| Infection * Dosage               | 29.490   | 2  | <b>0.014*</b>     |
| Infection * Line                 | 1.427    | 1  | 0.522             |
| Dosage * Line                    | 5.988    | 2  | 0.422             |
| Infection * Dosage * Line        | 27.801   | 2  | <b>0.018*</b>     |
| <u>Experiment 4</u>              |          |    |                   |
| Infection                        | 0.039    | 1  | 0.910             |
| Stress                           | 285.361  | 2  | < <b>0.001***</b> |
| Line                             | 0.714    | 1  | 0.629             |
| Infection * Stress               | 34.158   | 2  | <b>0.004**</b>    |
| Infection * Line                 | 5.298    | 1  | 0.188             |
| Stress * Line                    | 2.991    | 2  | 0.614             |
| Infection * Stress * Line        | 0        | 2  | 1.000             |

223 "Infection" refers to fungal infection (uninfected control, infected). "Line" refers to aphid line

224 (L01 and LRi in Experiment 1, 3, 4; all six lines in Experiment 2 Replicate A; 5 of 6 lines

225 (L313 excluded) in Experiment 2 Replicate B). "Dosage" refers to the degree of pathogen

226 exposure, and "Stress" refers to rearing environment (no-stress control, drought, starvation).

227 In Experiment 1, F1 are offspring of experimentally infected F0 mothers. While we also  
228 collected data on the F2 offspring of F1 aphids, the results for F2 were not analyzed because  
229 very few F2 winged offspring were produced: out of a total of 195 F1 aphids used, only two  
230 of them produced a winged offspring (2 out of 2854 offspring in total).

231

232 **Fig 1. Experiment 1. Fungal infection reduced survival but had no effect on the**  
233 **proportion of offspring that were winged across two aphid lines.** F1 are offspring of  
234 experimentally infected or control F0 mothers. (A) F0 aphid survival upon *Pandora* infection.  
235 Solid lines indicate aphid line LRi (with *Regiella*) and dotted lines indicate line L01 (without  
236 *Regiella*); (B) the proportion of F1 offspring that were winged. An average of 10.3 offspring  
237 were produced per F0 aphid over four days. Sample sizes range from 9 - 10 (median = 10) F0  
238 monitored for winged offspring production per treatment group. Points are proportion of  
239 winged offspring for each F0 individual; bars represent mean  $\pm 1$  SEM.

240

241 **Experiment 2: Influence of alternative *Regiella* lines on**  
242 **transgenerational wing induction upon *Pandora* infection**

243 **Replicate A**

244 Fungal infection significantly reduced aphid survival (Fig 2A;  $\chi^2 = 64.907$ ,  $df = 1$ ,  $P <$   
245  $0.001$ ), and symbiont genotype had a significant effect on host survival upon fungal infection

246 ( $\chi^2 = 29.908$ ,  $df = 5$ ,  $P < 0.001$ ). Resistance against *Pandora* differed between the six  
247 aphid-lines: LRi, LUi, and L313 had significantly higher survival than L01, while L515 and  
248 LCO21 did not (Fig 2B, Table 2). Neither fungal infection nor aphid line had significant main  
249 effects on the proportion of offspring that were winged; however, the interaction term had a  
250 significant effect, suggesting a role for symbionts in altering induction of winged offspring  
251 production (Fig 2C, Table 1).

252

253 **Table 2. Differences in survival between aphid lines in Experiment 2.**

|                                  | <b>Z</b> | <b>P-value</b>       |
|----------------------------------|----------|----------------------|
| <u>Experiment 2: Replicate A</u> |          |                      |
| L313 – L01                       | -2.408   | <b>0.016*</b>        |
| L515 – L01                       | -0.389   | 0.700                |
| LCO21 – L01                      | -1.555   | 0.120                |
| LRi – L01                        | 3.862    | <b>&lt; 0.001***</b> |
| LUi – L01                        | -3.496   | <b>&lt; 0.001***</b> |
| <u>Experiment 2: Replicate B</u> |          |                      |
| L515 – L01                       | -0.942   | 0.346                |
| LCO21 – L01                      | 0.540    | 0.589                |
| LRi – L01                        | -3.441   | <b>&lt; 0.001***</b> |
| LUi – L01                        | -3.462   | <b>&lt; 0.001***</b> |

254 Each aphid line with *Regiella* was compared to L01, which did not harbor *Regiella*. In  
255 Replicate B, aphid line L313 was removed from the analysis due to low survival of  
256 uninfected controls (all died within 10 days).

257

258 **Fig 2. Experiment 2. Lines with different symbionts varied in terms of survival upon**

259 **fungal infection but did not consistently vary in terms of winged offspring production.**

260 Replicate A shown in (A) – (C), and Replicate B shown in (D) – (F). **(A) and (D):** survival

261 upon *Pandora* infection relative to control, uninfected aphids - aphids lines combined. In

262 both replicates, fungal infection reduced aphid survival. **(B) and (E):** survival upon *Pandora*

263 infection – aphid lines plotted separately for pathogen infected groups only. In both replicates,

264 *Regiella* genotype impacts aphid survival upon infection. Note that in (B), the survival curve

265 for L01 and L515 are shown as the same color because the curves completely overlap. **(C)**

266 **and (F):** the proportion of offspring that were winged upon fungal infection. In Replicate A,

267 an average of 22.1 offspring per experimental aphid were produced across three days; in

268 Replicate B, an average of 25.2 offspring were produced across four days. In Replicate A,

269 fungal infection did not consistently induce an increase in winged offspring production;

270 however, in Replicate B, fungal infection consistently induced an increase in winged

271 offspring production. Although the two replicates showed strikingly different patterns, there

272 was a significant interaction between infection and aphid line found in both replicates,

273 suggesting that symbiont genotypes alter responses to fungal infections in different ways.

274 Error bars in (C) and (F) represent mean  $\pm$ 1 SEM. For Replicate A, sample sizes range from 3

275 – 10 (median = 6.5) experimental aphids monitored for survival and proportion of winged

276 offspring produced per treatment group. For Replicate B, sample sizes range from 11 – 12

277 (median = 12) experimental aphids monitored for survival and proportion of winged offspring



278 produced per treatment group.

279

## 280 **Replicate B**

281 Consistent with Replicate A, fungal infection significantly reduced aphid survival (Fig  
282 2D;  $\chi^2 = 115.301$ ,  $df = 1$ ,  $P < 0.001$ ), and symbiont genotype had a significant effect on  
283 survival upon fungal infection ( $\chi^2 = 26.099$ ,  $df = 4$ ,  $P < 0.001$ ). Resistance against *Pandora*  
284 differed between aphid lines: LRi and LUi had significantly higher survival than L01, while  
285 L515 and LCO21 did not (Fig 2E, Table 2). Though patterns of survival were similar to  
286 Replicate A, transgenerational wing induction was strikingly different. The proportion of  
287 offspring that were winged was significantly influenced by fungal infection, aphid line, and  
288 their interaction (Fig 2F, Table 1).

289

## 290 **Experiment 3: Influence of pathogen dose on transgenerational** 291 **wing induction upon *Pandora* infection**

292 Fungal infection, infection dosage, and aphid line all had significant effects on host  
293 survival upon fungal infection (Fig 3; infection:  $\chi^2 = 44.542$ ,  $df = 1$ ,  $P < 0.001$ ; dosage:  $\chi^2 =$   
294  $13.378$ ,  $df = 1$ ,  $P < 0.001$ ; line:  $\chi^2 = 12.264$ ,  $df = 1$ ,  $P < 0.001$ ); higher dosages caused higher  
295 mortality in both lines. Fungal dosage had a significant effect on the proportion of offspring  
296 that were winged, as did the interaction between dosage and infection and the three-way

297 interaction between infection, dosage, and aphid line (Fig 4, Table 1). However, the  
298 proportion of offspring that were winged was generally low: across all fungally infected  
299 aphid treatments only 46 of 1666 offspring (2.76%) were winged.

300

301 **Fig 3. Experiment 3. Higher fungal dosage led to lower survival upon infection across**  
302 **two aphid lines.** Each infection dosage has a corresponding control group in order to control  
303 for the effect of infection period (*i.e.*, the time aphids stayed in infection chambers). Low  
304 dose represents 1.6 spores/mm<sup>2</sup>, medium dose represents 12.5 spores/mm<sup>2</sup>, and high dose  
305 represents 144.1 spores/mm<sup>2</sup>. (A) aphid lines combined; (B) aphid lines plotted separately for  
306 infected groups only. Solid lines indicate aphid line LRi (with *Regiella*), and dotted lines  
307 indicate line L01 (without *Regiella*). Sample sizes range from 10 – 12 (median = 11) per  
308 treatment group.

309

310 **Fig 4. Experiment 3. The effects of infection, fungal dosage, and aphid lines on the**  
311 **proportion of offspring that were winged.** Each infection dosage has a corresponding  
312 control group in order to control for the effect of infection period (*i.e.*, the time aphids stayed  
313 in infection chambers). Low dose represents 1.6 spores/mm<sup>2</sup>, medium dose represents 12.5  
314 spores/mm<sup>2</sup>, and high dose represents 144.1 spores/mm<sup>2</sup>. (A) aphid line L01 (B) aphid line  
315 LRi. In this experiment, the proportion of offspring that were winged was generally low:

316 across all fungally infected aphid treatments only 46 of 1666 offspring (2.76%) were winged  
317 (Note that the y-axis scale is 0 to 0.6). An average of 24.4 offspring were produced per  
318 experimental aphid across four days. Sample sizes range from 10 – 12 (median = 11)  
319 experimental aphids monitored for proportion of winged offspring produced per treatment  
320 group. Points represent proportion of offspring that were winged for a particular individual;  
321 bars represent mean  $\pm$ 1 SEM.

322

#### 323 **Experiment 4: Influence of environmental condition on** 324 **transgenerational wing induction upon *Pandora* infection**

325 A high background death rate was observed across treatments in this experiment.  
326 Neither the main effects of infection, environmental condition, nor aphid line had significant  
327 effects on host survival upon infection (Fig 5; infection:  $\chi^2 = 0.001$ ,  $df = 1$ ,  $P = 0.982$ ; stress:  
328  $\chi^2 = 0.437$ ,  $df = 1$ ,  $P = 0.804$ ; line:  $\chi^2 = 0.695$ ,  $df = 1$ ,  $P = 0.404$ ). Environmental condition,  
329 however, had a significant effect on the proportion of offspring that were winged, as did the  
330 interaction between stress and infection (Fig 6, Table 1). The most striking influence on  
331 winged offspring was starvation of mothers, which stimulated transgenerational winged  
332 offspring production in both the presence and absence of fungal infection.

333

334 **Fig 5. Experiment 4. Stress, infection, and aphid line had no effect on aphid survival**

335 **upon fungal infection.** Solid lines indicate aphid line LRi (with *Regiella*), and dotted lines  
336 indicate aphid line L01 (without *Regiella*). (A) no-stress (control) treatment; (B) drought  
337 treatment; (C) starvation treatment; (D) survival of infected aphids only, all treatments.  
338 Sample sizes equal to seven individuals per treatment group.

339

340 **Fig 6. Experiment 4. Starvation induced an increase in the production of offspring that**  
341 **were winged but fungal infection did not.** (A) aphid line L01, and (B) aphid line LRi. An  
342 average of 21.2 offspring were produced per experimental aphid across four days. Sample  
343 sizes equal to seven experimental aphids per treatment group. Points represent proportion of  
344 offspring that were winged for a particular individual; bars represent mean  $\pm 1$  SEM.

345

## 346 **Discussion**

347 The utilization and efficacy of defenses is often dependent on genotype-by-genotype  
348 interactions and on environmental context [30,31]. In this study, we tested for the influence of  
349 multi-generational effects, symbiont genotype, pathogen dosage, and two abiotic stressors on  
350 the expression of an induced defense trait – production of winged offspring in response to  
351 fungal infection. Though transgenerational wing induction in response to fungal infection was  
352 reported in a previous study [8], we did not consistently observe wing induction. Our results  
353 suggest that wing induction of pea aphids upon *Pandora* infection may be strongly dependent

354 on particular factors that were not captured in our experimental design. Given that the aphid  
355 and *Pandora* genotypes we used were different from the ones used in Hatano et al. [8], one  
356 possibility is that the response may vary between host genotypes, may vary based on  
357 pathogen genotypes, or may be influenced by genotype-by-genotype interactions. However,  
358 in our study, replicate experiments (e.g., Experiment 2 Replicates A and B) exhibited  
359 considerable differences, suggesting that environmental variation not captured here also  
360 influences expression of this defense.

361 In Experiment 1, we tested whether exposure to pathogens leads to production of more  
362 winged daughters and/or more winged granddaughters. Our consideration of the potential  
363 influence on granddaughter physiology stems from the interesting reproductive biology of  
364 aphids. In days with relatively high levels of light, pea aphids reproduce via parthenogenesis,  
365 producing offspring as first instar nymphs (viviparous). Prior to birth, their developing  
366 embryos already have embryos developing within them, a condition known as telescoping  
367 generations [32]. As a result, it creates an opportunity for aphids to receive maternal and even  
368 grandmaternal signals related to environmental conditions and pathogen exposure [33].  
369 Because of previous findings that aphids produced a greater proportion of winged offspring  
370 in response to fungal infection [8], we asked whether this pathogen exposure could have  
371 longer lasting effects across multiple generations. As we saw no influence of pathogen  
372 exposure on winged offspring production in either generation, this is not a consistently

373 observed phenomenon. However, future work should test this interesting hypothesis in  
374 relation to other pea aphid defense traits.

375       Given that we saw little evidence of transgenerational wing induction in response to  
376 fungal infection in Experiment 1, we carried out a set of experiments to explore how genetic  
377 and non-genetic (environmental) variation might influence this trait. In Experiment 2, we  
378 asked whether symbiont genotypes varied in their effects on transgenerational wing induction  
379 in response to fungal infection. This built on previous research showing that *R. insecticola*  
380 genotypes vary in the level of protection that they confer against *P. neoaphidis* [17]. In the  
381 first replicate of the experiment, we saw no significant main effect of either fungal infection  
382 or symbiont genotype on the production of winged offspring, but the interaction between  
383 infection and symbiont genotype was significant, suggesting that lines with alternative  
384 symbionts varied in their response to infection. In contrast, in the second replicate, all aphid  
385 lines, regardless of symbiont genotype, produced more winged offspring when fungally  
386 infected, though the strength of the response varied across lines. Despite the inconsistent  
387 main effects of fungal infection and symbiont genotype, the fact that both experimental  
388 replicates demonstrated significant symbiont genotype by fungal infection interactions  
389 suggests that *Regiella* may play a role in regulating the response and that this regulation is  
390 likely symbiont genotype-specific.

391       Given the differences observed between the outcomes of the two replicates of

392 Experiment 2, we asked what environmental conditions could have differed between the two  
393 replicates as a way to begin to understand the variable expression of transgenerational wing  
394 induction in response to fungal infection. We first noted that fungal pathogen virulence was  
395 higher in Replicate B than in Replicate A (Fig 2 (A) and (D)), consistent with the fact that  
396 fungal dosage in Replicate B (105.6 spores/mm<sup>2</sup>) was much higher than that in Replicate A  
397 (12.25 spores/mm<sup>2</sup>). We thus hypothesized that pathogen virulence and/or dosage could  
398 influence the expression of the defense trait. Results of Experiment 3 showed that higher  
399 fungal dosages led to lower survival, which is consistent with previous studies [22]. However,  
400 higher dosage did not result in higher proportions of winged offspring. Indeed, we instead  
401 observed fewer winged offspring produced when aphids were exposed to a higher pathogen  
402 dose. A recent study suggested that wing polyphenism in pea aphids is controlled by the  
403 ecdysone pathway – downregulation of the ecdysone pathway leads to increased winged  
404 offspring and vice versa [34]. Ecdysone is also identified as a positive regulator of innate  
405 immune mechanisms in other systems [35]. Therefore, it is possible that enhanced immune  
406 responses in the face of stronger pathogen challenge could lead to suppression of wing  
407 induction; however, future studies are required to disentangle the physiological mechanisms  
408 underlying this response.

409 Host defenses are often dependent on environmental-context [36]. For example, in  
410 honey bees, birds and humans decreasing nutrient availability decreases immunocompetence

411 [37–39]. We hypothesized that the variation that we observed between the two replicates of  
412 Experiment 2 could be a result of environment variation that influenced host condition.  
413 Specifically, control, uninfected aphids had lower survival in Experiment 2 Replicate B  
414 compared to Replicate A, suggesting that their overall condition may have been worse. In  
415 Experiment 4, we attempted to modulate host condition by rearing aphids under control,  
416 drought and starvation conditions. While starvation triggered a strong induction of winged  
417 offspring production, neither starvation nor drought enhanced responses to fungal infection.  
418 We should note, however, that fungal infection did not significantly impact aphid survival in  
419 this experiment, though we did observe sporulating aphids suggesting that the aphids were  
420 indeed infected. Thus, it is possible environmental stress could enhance transgenerational  
421 winged offspring production in response to fungal pathogen under different infection  
422 conditions.

423

## 424 **Conclusions**

425 In this study, through a series of experiments that tested the influence of multiple factors  
426 on transgenerational wing induction in response to *Pandora* infection, we did not consistently  
427 observe the increased production of winged offspring by infected individuals. Our results  
428 confirmed that *Regiella* genotypes differ in the strength of protection that they confer to  
429 aphids, and showed that wing induction, though not consistently expressed, may be



430 dependent on symbiont genotype to some extent. Our study further suggested that  
431 *Pandora*-induced winged offspring production may be strongly dependent on other  
432 environmental or non-genetic factors not captured in our experiments, and may have strong  
433 specificity across host, symbiont, and pathogen genotypes.

434

## 435 **Acknowledgments**

436 We thank Dr. Ben Parker for assistance with aphid symbiont infections, fungal infection  
437 protocols, and thoughtful feedback. We thank Manasa Peddineni for assistance with  
438 experiments. We thank Gerardo lab members for providing helpful comments on the  
439 manuscript and Tiger Li for comments on statistical analyses.

440

## 441 **Author contributions**

442 WHT designed and carried out experiments, and wrote the manuscript. MR, KH  
443 designed and carried out experiments, and edited the manuscript. NMG designed experiments  
444 and edited the manuscript. TA, FL, and JB assisted with experiments and provided comments  
445 on the manuscript.

446

## 447 **References**

448 1. Parker BJ, Barribeau SM, Laughton AM, de Roode JC, Gerardo NM.

- 449 Non-immunological defense in an evolutionary framework. *Trends Ecol Evol.* 2011;26:  
450 242–248. doi:10.1016/j.tree.2011.02.005
- 451 2. Lees AD. The production of the apterous and alate forms in the aphid *Megoura viciae*  
452 Buckton, with special reference to the rôle of crowding. *J Insect Physiol.* 1967;13:  
453 289–318. doi:10.1016/0022-1910(67)90155-2
- 454 3. Müller CB, Williams IS, Hardie J. The role of nutrition, crowding and interspecific  
455 interactions in the development of winged aphids. *Ecol Entomol.* 2001;26: 330–340.  
456 doi:10.1046/j.1365-2311.2001.00321.x
- 457 4. Kunert G, Otto S, Röse USR, Gershenson J, Weisser WW. Alarm pheromone mediates  
458 production of winged dispersal morphs in aphids. *Ecol Lett.* 2005;8: 596–603.  
459 doi:10.1111/j.1461-0248.2005.00754.x
- 460 5. Grindstaff JL, Brodie ED, Ketterson ED. Immune function across generations:  
461 Integrating mechanism and evolutionary process in maternal antibody transmission.  
462 *Proc R Soc B Biol Sci.* 2003;270: 2309–2319. doi:10.1098/rspb.2003.2485
- 463 6. Sadd BM, Kleinlogel Y, Schmid-Hempel R, Schmid-Hempel P. Trans-generational  
464 immune priming in a social insect. *Biol Lett.* 2005;1: 386–388.  
465 doi:10.1098/rsbl.2005.0369
- 466 7. Lefèvre T, Oliver L, Hunter MD, De Roode JC. Evidence for trans-generational  
467 medication in nature. *Ecol Lett.* 2010;13: 1485–1493.

- 468 doi:10.1111/j.1461-0248.2010.01537.x
- 469 8. Hatano E, Baverstock J, Kunert G, Pell JK, Weisser WW. Entomopathogenic fungi  
470 stimulate transgenerational wing induction in pea aphids, *Acyrtosiphon pisum*  
471 (Hemiptera: Aphididae). *Ecol Entomol.* 2012;37: 75–82.  
472 doi:10.1111/j.1365-2311.2011.01336.x
- 473 9. Oliver KM, Degan PH, Burke GR, Moran NA. Facultative symbionts in aphids and  
474 the horizontal transfer of ecologically important traits. *Annu Rev Entomol.* 2010;55:  
475 247–266. doi:10.1146/annurev-ento-112408-085305
- 476 10. Scarborough CL, Julia F, H.C.J G. Aphid protected from pathogen by endosymbiont.  
477 *Science.* 2005;310: 2005. doi:10.1126/science.1120180
- 478 11. Oliver KM, Moran NA, Hunter MS. Variation in resistance to parasitism in aphids is  
479 due to symbionts not host genotype. *Proc Natl Acad Sci.* 2005;102: 12795–12800.  
480 doi:10.1073/pnas.0506131102
- 481 12. Parker BJ, Spragg CJ, Altincicek B, Gerardo NM. Symbiont-mediated protection  
482 against fungal pathogens in pea aphids: A role for pathogen specificity. *Appl Environ*  
483 *Microbiol.* 2013;79: 2455–2458. doi:10.1128/AEM.03193-12
- 484 13. Van Veen FJF, Müller CB, Pell JK, Godfray HCJ. Food web structure of three guilds  
485 of natural enemies: Predators, parasitoids and pathogens of aphids. *J Anim Ecol.*  
486 2008;77: 191–200. doi:10.1111/j.1365-2656.2007.01325.x

- 487 14. Leonardo TE, Mondor EB. Symbiont modifies host life-history traits that affect gene  
488 flow. *Proc R Soc B Biol Sci.* 2006;273: 1079–1084. doi:10.1098/rspb.2005.3408
- 489 15. Caillaud MC, Boutin M, Braendle C, Simon JC. A sex-linked locus controls wing  
490 polymorphism in males of the pea aphid, *Acyrtosiphon pisum* (Harris). *Heredity.*  
491 2002;89: 346–352. doi:10.1038/sj.hdy.6800146
- 492 16. Łukasik P, Dawid MA, Ferrari J, Godfray HCJ. The diversity and fitness effects of  
493 infection with facultative endosymbionts in the grain aphid, *Sitobion avenae*.  
494 *Oecologia.* 2013;173: 985–996. doi:10.1007/s00442-013-2660-5
- 495 17. Parker BJ, Hrček J, McLean AHC, Godfray HCJ. Genotype specificity among hosts,  
496 pathogens, and beneficial microbes influences the strength of symbiont-mediated  
497 protection. *Evolution.* 2017;71: 1222–1231. doi:10.1111/evo.13216
- 498 18. Vorburger C, Gehrler L, Rodriguez P. A strain of the bacterial symbiont *Regiella*  
499 *insecticola* protects aphids against parasitoids. *Biol Lett.* 2010;6: 109–111.  
500 doi:10.1098/rsbl.2009.0642
- 501 19. Fukatsu T, Tsuchida T, Nikoh N. Spiroplasma symbiont of the pea aphid,  
502 *Acyrtosiphon pisum* (Insecta: Homoptera). *Appl Environ Microbiol.* 2001;67: 1284–  
503 1291. doi:10.1128/AEM.67.3.1284
- 504 20. Tsuchida T, Koga R, Sakurai M, Fukatsu T. Facultative bacterial endosymbionts of  
505 three aphid species, *Aphis craccivora*, *Megoura crassicauda* and *Acyrtosiphon pisum*,

- 506 sympatrically found on the same host plants. *Appl Entomol Zool.* 2006;41: 129–137.
- 507 doi:10.1303/aez.2006.129
- 508 21. Henry LM, Peccoud J, Simon JC, Hadfield JD, Maiden MJC, Ferrari J, et al.
- 509 Horizontally transmitted symbionts and host colonization of ecological niches. *Curr*
- 510 *Biol.* 2013;23: 1713–1717. doi:10.1016/j.cub.2013.07.029
- 511 22. Parker BJ, Garcia JR, Gerardo NM. Genetic variation in resistance and fecundity
- 512 tolerance in a natural host-pathogen interaction. *Evolution.* 2014;68: 2421–2429.
- 513 doi:10.1111/evo.12418
- 514 23. Papierok B, Hajek AE. *Fungi: Entomophthorales. Manual of techniques in insect*
- 515 *pathology.* L. A. Lace. London: Academic Press; 1997. pp. 187–212.
- 516 24. McVean RIK, Dixon A. The effect of plant drought-stress on populations of the pea
- 517 aphid *Acyrtosiphon pisum*. *Ecol Entomol.* 2001;26: 440–443.
- 518 doi:10.1046/j.1365-2311.2001.00341.x
- 519 25. Nelson EH. Predator avoidance behavior in the pea aphid: Costs, frequency, and
- 520 population consequences. *Oecologia.* 2007;151: 22–32.
- 521 doi:10.1007/s00442-006-0573-2
- 522 26. Tariq M, Wright DJ, Rossiter JT, Staley JT. Aphids in a changing world: Testing the
- 523 plant stress, plant vigour and pulsed stress hypotheses. *Agric For Entomol.* 2012;14:
- 524 177–185. doi:10.1111/j.1461-9563.2011.00557.x

- 525 27. Tabadkani SM, Ahsaei SM, Hosseininaveh V, Nozari J. Food stress prompts dispersal  
526 behavior in apterous pea aphids: Do activated aphids incur energy loss? *Physiol Behav.*  
527 2013;110–111: 221–225. doi:10.1016/j.physbeh.2012.12.004
- 528 28. Therneau TM. A package for survival analysis in S. 2015. Available:  
529 <https://cran.r-project.org/package=survival>
- 530 29. R Core Team. R: A language and environment for statistical computing. R Foundation  
531 for Statistical Computing. Vienna, Austria; 2017.
- 532 30. Echaubard P, Leduc J, Pauli B, Chinchar VG, Robert J, Lesbarrères D. Environmental  
533 dependency of amphibian-ranavirus genotypic interactions: Evolutionary perspectives  
534 on infectious diseases. *Evol Appl.* 2014;7: 723–733. doi:10.1111/eva.12169
- 535 31. Tétard-Jones C, Kertesz MA, Gallois P, Preziosi RF. Genotype-by-genotype  
536 interactions modified by a third species in a plant-insect system. *Am Nat.* 2007;170:  
537 492–499. doi:10.1086/520115
- 538 32. Brisson JA, Stern DL. The pea aphid, *Acyrtosiphon pisum*: An emerging genomic  
539 model system for ecological, developmental and evolutionary studies. *BioEssays.*  
540 2006;28: 747–755. doi:10.1002/bies.20436
- 541 33. Ogawa K, Miura T. Aphid polyphenisms: Trans-generational developmental regulation  
542 through viviparity. *Front Physiol.* 2014;5 JAN: 1–11. doi:10.3389/fphys.2014.00001
- 543 34. Vellichirammmal NN, Gupta P, Hall TA, Brisson JA. Ecdysone signaling underlies the

- 544 pea aphid transgenerational wing polyphenism. Proc Natl Acad Sci. 2017;114: 1419–  
545 1423. doi:10.1073/pnas.1617640114
- 546 35. Ahmed A, Martin D, Manetti AGO, Han S-J, Lee W-J, Mathiopoulos KD, et al.  
547 Genomic structure and ecdysone regulation of the prophenoloxidase 1 gene in the  
548 malaria vector *Anopheles gambiae*. Proc Natl Acad Sci. 1999;96: 14795–14800.  
549 doi:10.1073/pnas.96.26.14795
- 550 36. Sandland GJ, Minchella DJ. Costs of immune defense: An enigma wrapped in an  
551 environmental cloak? Trends Parasitol. 2003;19: 571–574.  
552 doi:10.1016/j.pt.2003.10.006
- 553 37. Lochmiller RL, Vestey MR, Boren JC. Relationship between protein nutritional status  
554 and immunocompetence in Northern Bobwhite Chicks. AUK. 1993;110: 503–510.  
555 doi:10.2307/4088414
- 556 38. Alaux C, Ducloz F, Crauser D, Conte Y Le. Diet effects on honeybee  
557 immunocompetence. Biol Lett. 2010;45. doi:10.1098/rsbl.2009.0986
- 558 39. Shankar AH, Genton B, Semba RD, Baisor M, Paino J, Tamja S, et al. Effect of  
559 vitamin A supplementation on morbidity due to *Plasmodium falciparum* in young  
560 children in Papua New Guinea: A randomised trial. Lancet. 1999;354: 203–209.  
561 doi:10.1016/S0140-6736(98)08293-2

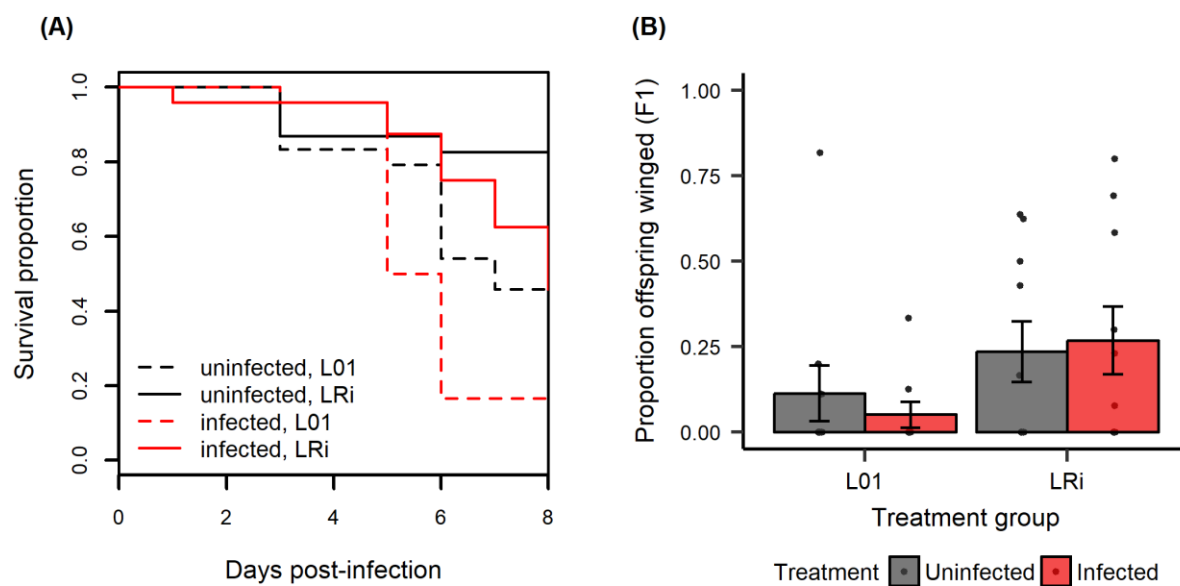

562

563 **Fig 1.**



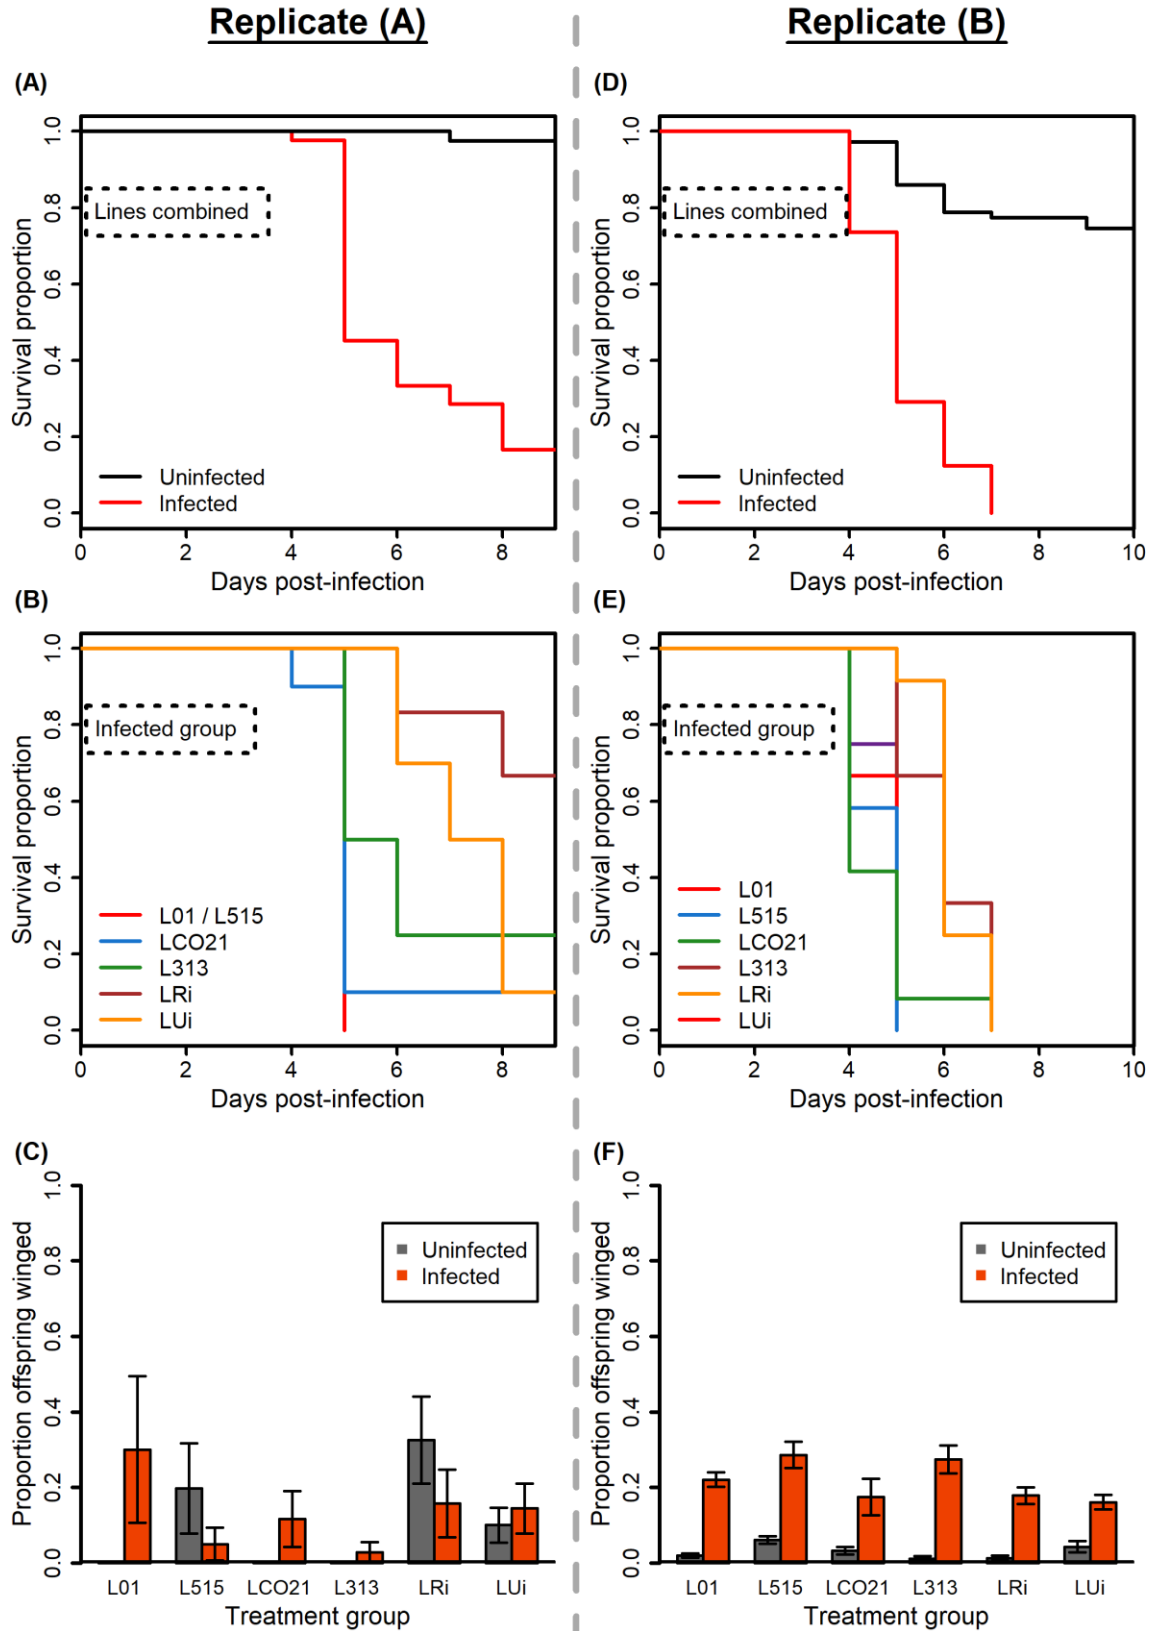

564

565 **Fig 2.**

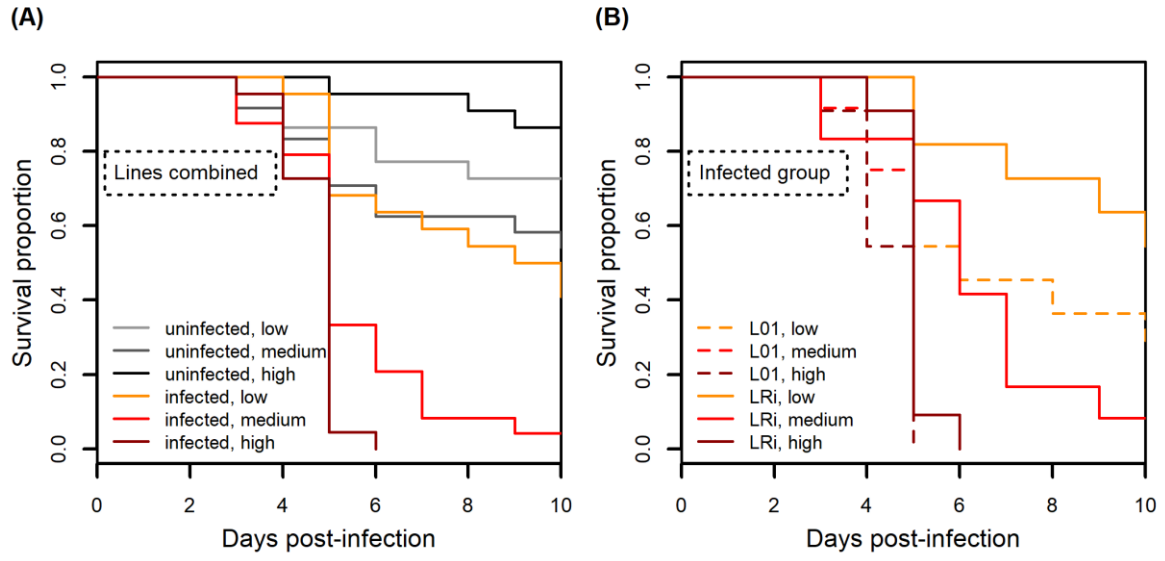

566

567 **Fig 3.**

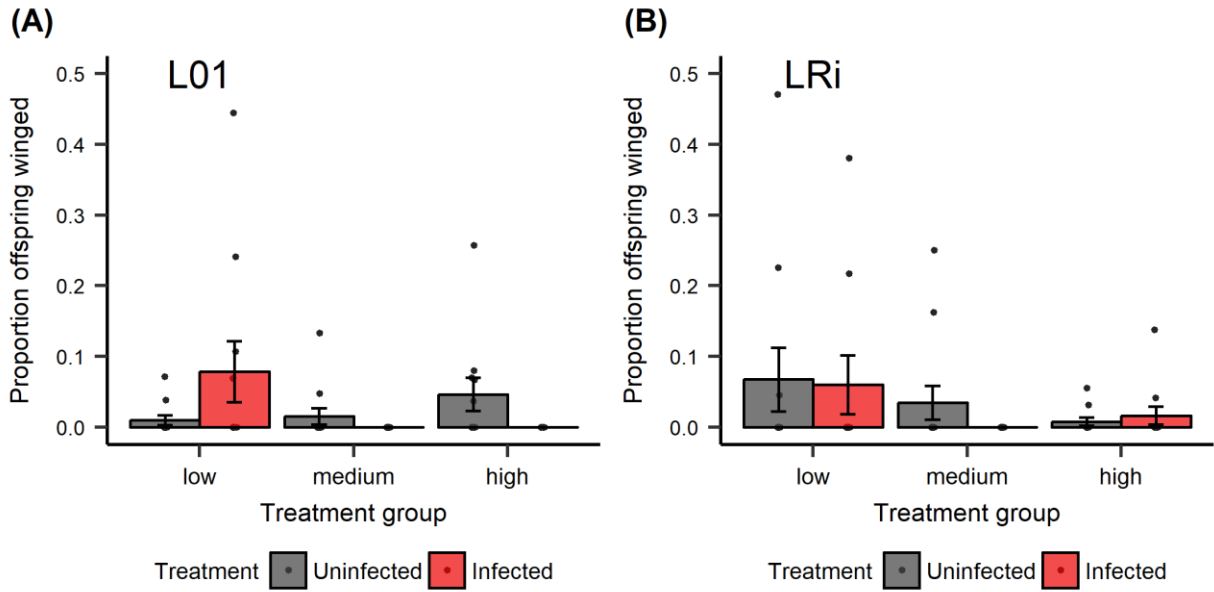

568

569 **Fig 4.**

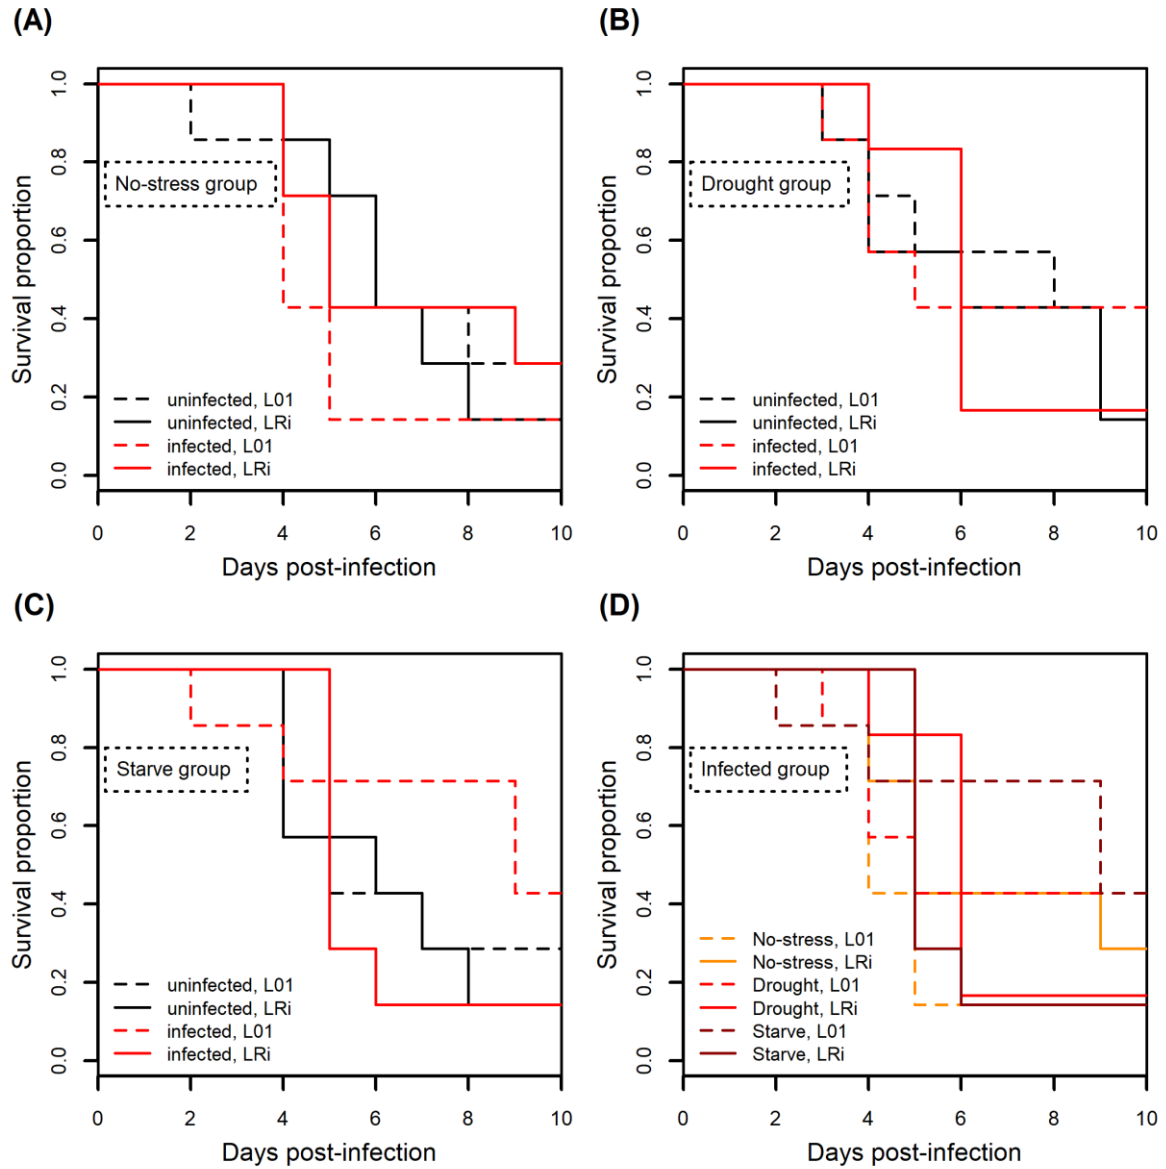

570

571 **Fig 5.**

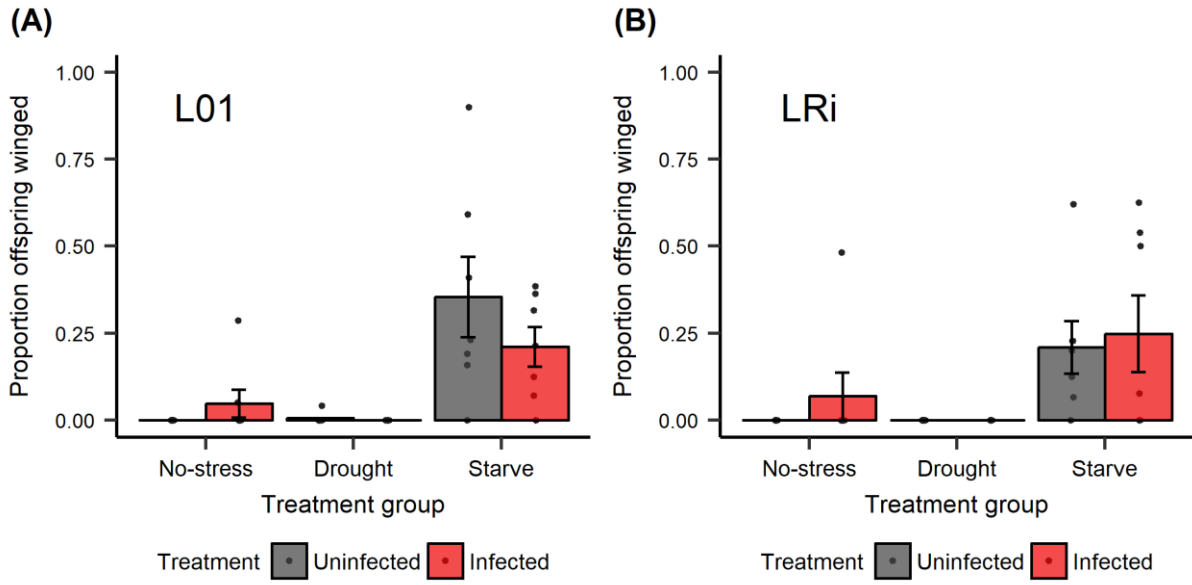

572

573 **Fig 6.**
